# Supplementary material for: Time for quartet: the stable 3 : 1 cocrystal formulation of FTDO and BTF – a high-energy-density material
Source: Royal Society of Chemistry journal article supplement (doi:10.1039/d0ce00639d), 2020-01-01
Supplement: d0ce00639d1.pdf [file d0ce00639d1.pdf]

## Time for quartet: the stable 3:1 cocrystal formulation of FTDO and BTF – a high-energy-density material

Victor P. Zelenov, Nikita M. Baraboshkin, Dmitry V. Khakimov, Nikita V. Muravyev, Dmitry B. Meerov, Ivan A. Troyan, Tatyana S. Pivina, Alexandr V. Dzyabchenko, and Ivan V. Fedyanin

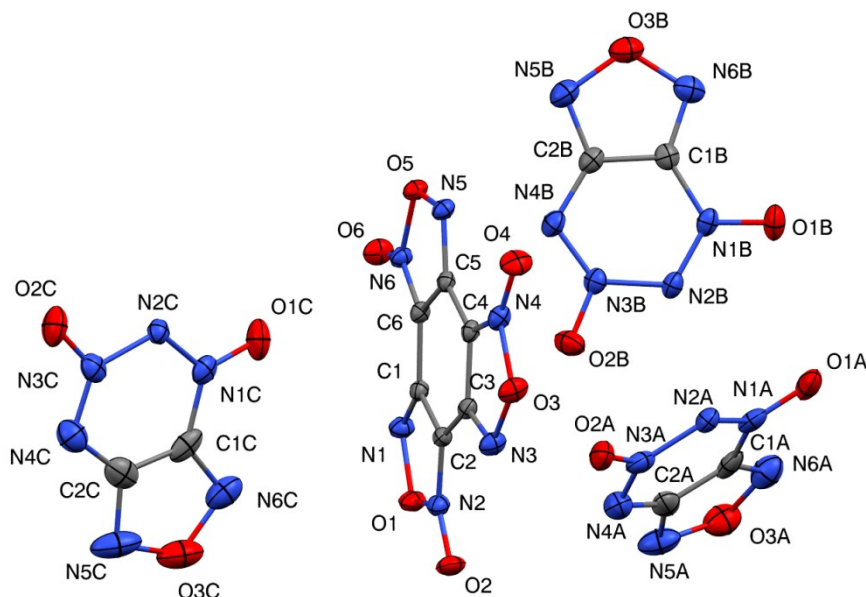

**Figure S1.** A representative part of unit cell of FTDO–BTF (3:1) cocrystal. Atoms are represented by thermal displacement ellipsoids from experimental X-Ray diffraction data.

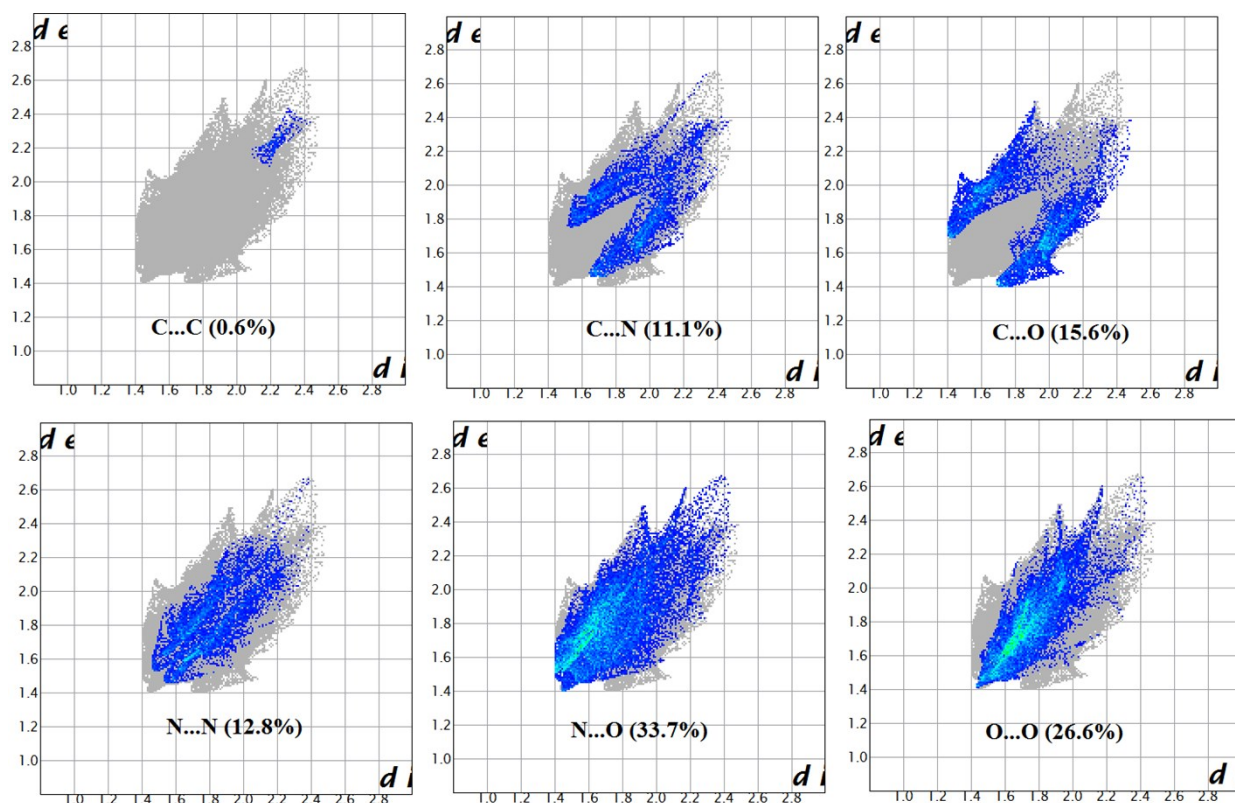

**Figure S2.** FTDO–BTF (1:1) calculated structure 2D-fingerprint plots.

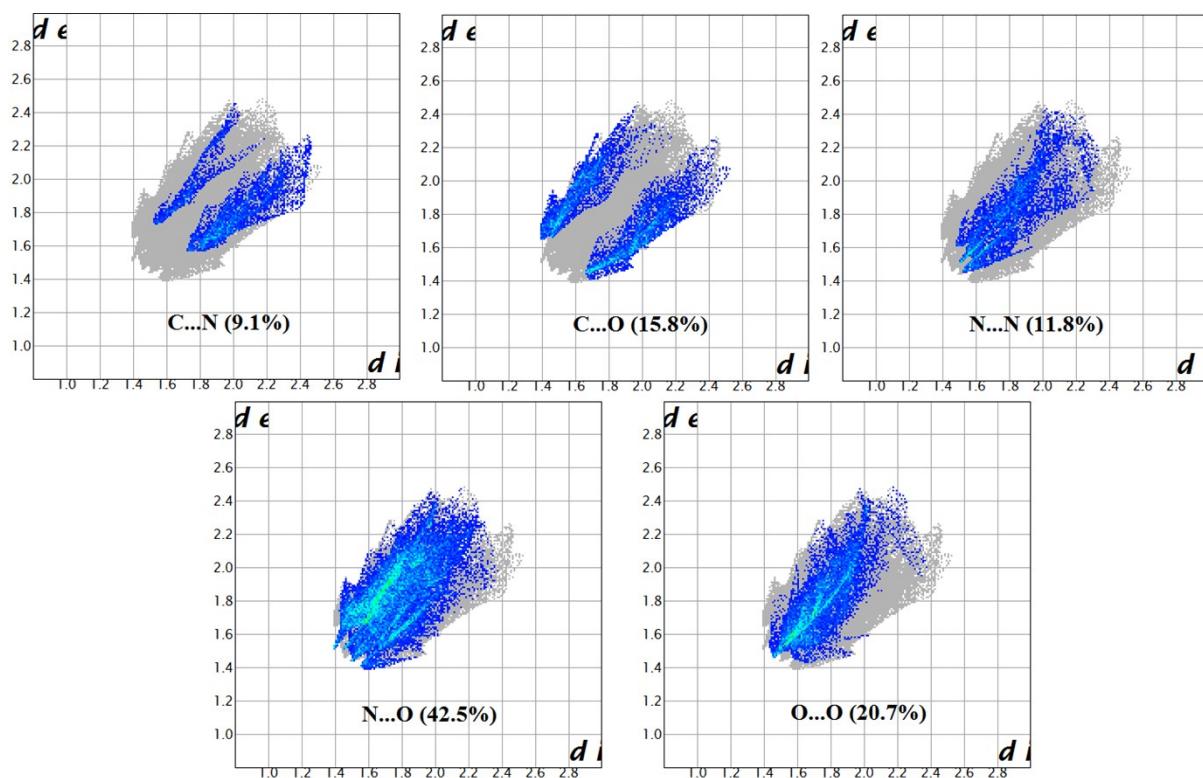

**Figure S3.** FTDO-BTF (2:1) calculated structure 2D-fingerprint plots.

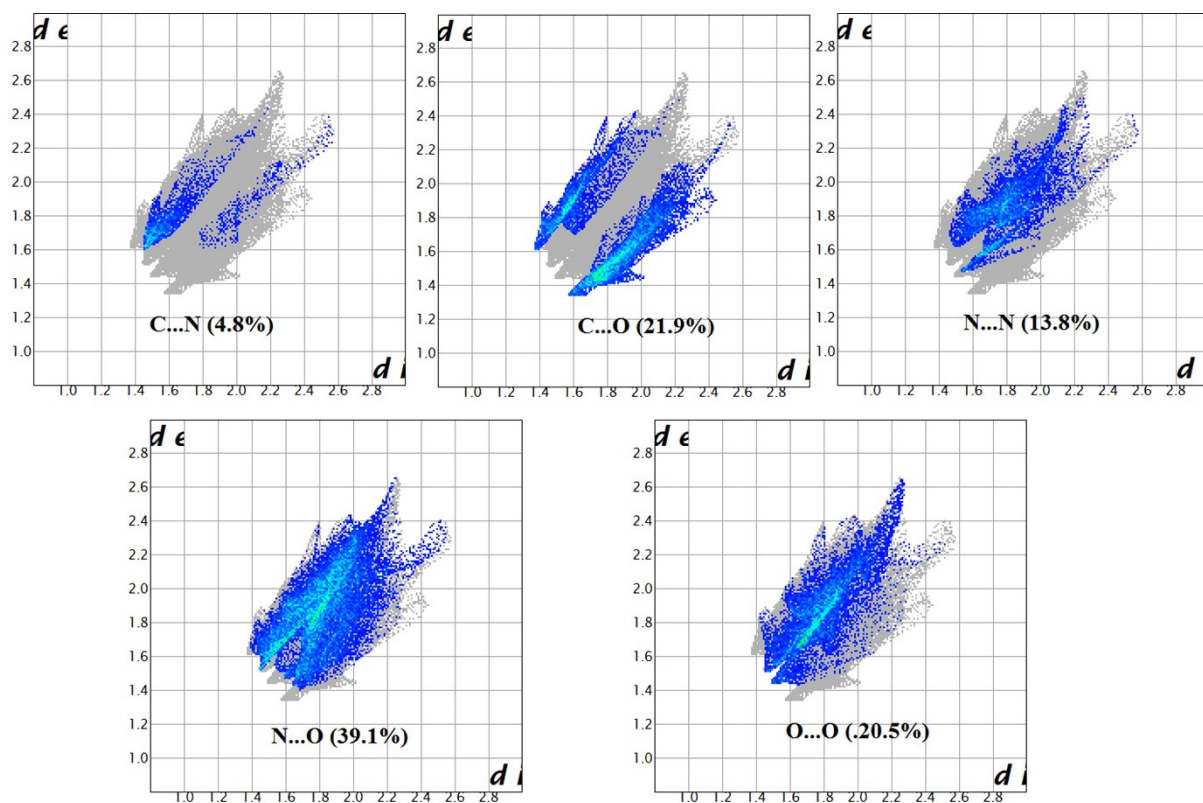

**Figure S4.** FTDO-BTF (3:1) calculated structure 2D-fingerprint plots.

**Table S1.** List of short contacts in the FTDO–BTF (3:1) cocrystal at 298 K.

| Number | Atom1 | Atom2 | Length |
|--------|-------|-------|--------|
| 1      | O2B   | O2B   | 2.907  |
| 2      | O2A   | N3B   | 2.911  |
| 3      | N3A   | O2D   | 2.912  |
| 4      | C3    | O2B   | 2.921  |
| 5      | O2B   | N3B   | 2.923  |
| 6      | O5    | O1A   | 2.941  |
| 7      | O4    | N2D   | 2.960  |
| 8      | C2    | O2B   | 2.963  |
| 9      | N6D   | O1A   | 2.970  |
| 10     | O6    | O2A   | 2.975  |
| 11     | O4    | C1A   | 2.988  |
| 12     | O6    | O1D   | 3.011  |
| 13     | N6    | N4A   | 3.012  |
| 14     | O6    | N2A   | 3.033  |
| 15     | O4    | N6A   | 3.038  |
| 16     | C4    | O2D   | 3.039  |
| 17     | N2A   | N1B   | 3.052  |
| 18     | N3    | C1B   | 3.063  |
| 19     | O2    | N6D   | 3.063  |
| 20     | C5    | O2D   | 3.081  |
| 21     | N2A   | N2D   | 3.087  |
| 22     | N5    | C1D   | 3.088  |
| 23     | O6    | C2B   | 3.113  |
| 24     | C4    | O1B   | 3.116  |
| 25     | N1    | C2A   | 3.123  |
| 26     | N1    | C1A   | 3.150  |
| 27     | C3    | O1B   | 3.152  |
| 28     | O2    | C1D   | 3.158  |
| 29     | C6    | O2A   | 3.169  |
| 30     | C6    | O1D   | 3.169  |
| 31     | C1    | O2A   | 3.170  |
| 32     | O6    | C1B   | 3.181  |
| 33     | C1    | O1D   | 3.190  |
| 34     | O4    | C2A   | 3.194  |
| 35     | N5    | C2D   | 3.221  |

**Table S2.** A comparison of the experimental vibrational spectra of BTF, FTDO and (3:1) cocrystal

| FTDO  |       | BTF   |      | Cocrystal (3:1) |       | Frequency assignment <sup>a</sup> |
|-------|-------|-------|------|-----------------|-------|-----------------------------------|
| Raman | IR    | Raman | IR   | Raman           | IR    |                                   |
| 115w  |       |       |      | 115w            |       |                                   |
| 146w  |       | 145m  |      | 146vw           |       |                                   |
|       |       | 166w  |      | 170vw           |       |                                   |
|       |       | 186m  |      |                 |       |                                   |
|       |       | 191s  |      | 194w            |       |                                   |
| 214w  |       | 211w  |      | 219w            |       |                                   |
| 233w  |       |       |      | 234w            |       |                                   |
|       |       | 290s  |      | 293s            |       |                                   |
|       |       | 314m  |      |                 |       |                                   |
| 328s  |       |       |      | 327s            |       |                                   |
| 376w  |       |       |      | 377w            |       |                                   |
|       |       | 381s  |      | 385w            |       |                                   |
| 407m  |       |       |      | 407m            | 408s  |                                   |
| 410w  |       |       |      | 410m            |       |                                   |
|       |       |       | 415m |                 |       |                                   |
| 422w  |       |       |      |                 |       |                                   |
|       |       | 431w  |      | 430m            |       |                                   |
|       |       |       | 437s |                 | 443s  |                                   |
|       |       | 460s  |      |                 |       |                                   |
| 477s  | 477s  |       |      | 478s            | 477s  |                                   |
|       |       | 523s  |      | 525m            |       |                                   |
| 552s  | 551s  |       |      | 552s            | 551s  |                                   |
|       |       |       |      | 554s            |       |                                   |
|       |       | 564w  |      | 566w            |       |                                   |
|       |       | 572vw | 571w |                 | 573m  |                                   |
| 589s  | 587s  |       |      | 589s            | 588s  |                                   |
|       | 600m  |       |      | 600w            | 599m  |                                   |
| 632w  | 630m  |       |      |                 | 631m  |                                   |
|       |       |       | 648s |                 | 653s  |                                   |
| 679w  | 677s  | 679w  |      | 680w            | 677s  | TDO-ring                          |
| 724s  | 724s  |       |      | 726s            | 723s  |                                   |
|       |       | 732w  | 736m |                 | 738m  |                                   |
|       | 746m  |       |      |                 | 746w  |                                   |
|       |       | 782s  |      | 785w            |       |                                   |
|       |       | 807w  | 806s | 812vw           | 810s  |                                   |
| 859m  | 853s  |       |      | 859m            | 853s  |                                   |
|       | 872s  |       |      | 871s            | 870s  |                                   |
| 875s  |       |       |      | 874s            |       |                                   |
|       |       |       |      |                 | 914m  |                                   |
|       |       | 936s  | 930w |                 |       |                                   |
| 940s  | 940s  |       |      | 941s            | 940s  |                                   |
|       |       | 961w  | 961s |                 | 962s  |                                   |
|       |       |       | 997w |                 |       |                                   |
| 1019s | 1019s |       |      | 1019s           | 1017s |                                   |
|       |       | 1042w |      |                 |       |                                   |

|        |        |        |        |        |        |                              |
|--------|--------|--------|--------|--------|--------|------------------------------|
|        |        | 1081m  | 1078s  |        | 1082s  |                              |
|        |        |        | 1109w  |        | 1109w  |                              |
| 1149vs | 1149s  |        |        | 1147s  | 1148s  | TDO-ring                     |
|        |        |        |        | 1151vs |        |                              |
|        |        |        |        | 1175w  | 1178m  |                              |
| 1212m  |        |        |        | 1212s  | 1210m  |                              |
|        |        | 1283s  |        |        |        |                              |
|        |        | 1292m  | 1290s  | 1290w  | 1295s  |                              |
|        |        | 1298m  |        |        |        |                              |
|        |        |        | 1305m  |        | 1305s  |                              |
|        | 1318s  |        |        |        | 1320s  |                              |
|        |        |        |        |        | 1354m  |                              |
| 1409s  |        |        |        | 1412m  | 1410s  |                              |
|        | 1421s  | 1419m  | 1417s  | 1422m  | 1419s  | $\nu^{\text{as}}$ (N=N) FTDO |
|        |        | 1450m  |        | 1446w  |        |                              |
| 1457m  |        |        |        | 1455s  |        |                              |
|        | 1460vs |        |        | 1462w  | 1460s  |                              |
|        |        |        |        | 1478vw |        |                              |
| 1509w  | 1514vs |        |        | 1510m  | 1508vs |                              |
|        |        |        |        | 1535m  | 1536s  |                              |
|        |        |        |        | 1540s  |        |                              |
| 1544s  | 1543vs |        |        | 1547s  |        | $\nu^{\text{s}}$ (N=N) FTDO  |
|        |        | 1564vs |        | 1562w  |        |                              |
|        |        | 1568s  | 1568vs | 1570s  |        |                              |
|        |        | 1577s  |        |        | 1578s  |                              |
| 1591s  | 1589s  |        |        | 1587s  |        |                              |
|        |        |        | 1605s  |        |        |                              |
|        |        |        |        |        | 1617w  |                              |
|        |        | 1649s  | 1649vs | 1657w  | 1656vs |                              |
|        |        | 1666w  |        | 1667w  | 1665vs |                              |
|        |        |        |        |        |        |                              |
|        |        |        |        |        |        |                              |

<sup>a</sup> Frequency assignment is given for the key frequencies for FTDO accordingly literature data<sup>1</sup>.

**Table S3.** The vibrational spectra of BTF

| Raman     |       |          | IR        |       |            |               |
|-----------|-------|----------|-----------|-------|------------|---------------|
| This work |       | Lit. [2] | This work |       | Lit.       |               |
| Exp.      | Calc. |          | Exp.      | Calc. | Bailey [3] | Katritzky [2] |
|           | 83w   |          |           |       |            |               |
| 145m      |       |          |           | 102s  |            |               |
| 166w      |       |          |           |       |            |               |
| 186m      |       | 185m     |           | 186m  |            |               |
| 191s      | 187s  | 190m     |           |       |            |               |
| 211w      |       |          |           |       |            |               |
| 290s      | 259s  | 290m     |           |       |            |               |
| 314m      | 317s  | 320vw    |           |       |            |               |
| 381s      | 382vs | 380w     |           | 384s  |            |               |
|           | 410s  |          | 415m      |       |            | 420br         |
| 431w      | 421s  | 430w     |           |       |            |               |
|           |       |          | 437s      | 420s  |            | 440br         |

|        |        |       |        |         |                   |       |
|--------|--------|-------|--------|---------|-------------------|-------|
| 460s   |        | 465m  |        |         |                   |       |
| 523s   | 526vs  | 520w  |        |         |                   |       |
| 564w   |        | 564vw |        | 556m    |                   |       |
| 572vw  | 601s   | 570w  | 571w   | 606m    |                   | 570w  |
|        | 648s   |       | 648s   | 648s    |                   | 651s  |
| 679w   |        |       |        |         |                   |       |
| 732w   | 734s   |       | 736m   |         | 735               | 736w  |
| 782s   | 792m   | 780w  |        |         |                   |       |
| 807w   | 821s   | 810w  | 806s   | 819vs   | 807               | 810ms |
| 936s   | 958s   | 935w  | 930w   |         | 935               | 935w  |
| 961w   |        |       | 961s   |         | 962               | 965s  |
|        | 1004s  |       | 997w   | 1005vs  |                   |       |
| 1042w  |        |       |        |         |                   |       |
| 1081m  | 1084vs | 1085w | 1078s  | 1119s   | 1075              | 1082m |
|        | 1120s  |       | 1109w  |         | 1105              | 1105w |
| 1283s  | 1303vs | 1285w |        |         |                   |       |
| 1292m  |        |       | 1290s  |         | 1287              | 1287w |
| 1298m  | 1321vs |       |        |         |                   |       |
|        |        |       | 1305m  | 1320s   | 1304              | 1304w |
| 1419m  | 1444vs | 1420w | 1417s  | 1444s   | 1416              | 1415m |
| 1450m  | 1487vs | 1455w |        |         |                   |       |
|        |        |       |        |         | 1508 <sup>a</sup> |       |
|        |        |       |        |         | 1540 <sup>a</sup> |       |
| 1564vs |        |       |        |         |                   |       |
| 1568s  | 1595vs | 1570s | 1568vs | 1612vs  | 1572              | 1570s |
| 1577s  |        |       |        |         |                   |       |
|        |        |       | 1605s  |         | 1608              | 1608w |
| 1649s  | 1721s  | 1650m | 1649vs | 1720vvs | 1656              | 1656s |
| 1666w  | 1746s  |       |        |         |                   |       |

<sup>a</sup> Possibly, the frequencies of an admixture.

**Table S4.** The vibrational spectra of FTDO

| Raman             |       | IR                |       | Lit. [1]         |
|-------------------|-------|-------------------|-------|------------------|
| This work         |       | This work         |       |                  |
| Exp.              | Calc. | Exp.              | Calc. |                  |
|                   |       |                   |       | 74 <sup>a</sup>  |
| 115w <sup>a</sup> | 102w  |                   | 102w  |                  |
| 146w              | 162w  |                   | 163w  | 146              |
| 214w <sup>a</sup> | 208vw |                   | 209s  |                  |
|                   |       |                   |       | 226 <sup>a</sup> |
| 233w <sup>a</sup> |       |                   |       | 234              |
| 328s              | 333m  |                   | 333s  | 329              |
| 376w              | 356vw |                   | 357s  | 375              |
| 407m              | 396vw |                   | 396s  |                  |
| 410w <sup>a</sup> |       |                   |       |                  |
| 422w              |       |                   |       | 418              |
| 477s              | 474s  | 477s              | 474s  | 479              |
| 552s              | 551s  | 551s              | 551s  | 548              |
| 589s              | 583vs | 587s              | 583s  | 585              |
|                   |       | 600m <sup>a</sup> |       |                  |

|                    |        |                   |         |                   |
|--------------------|--------|-------------------|---------|-------------------|
| 632w               | 616w   | 630m              | 617s    |                   |
| 679w               | 674w   | 677s              | 674s    | 676               |
|                    | 711w   |                   |         |                   |
| 724s               | 738s   | 724s              | 738s    | 722               |
|                    |        | 746m <sup>a</sup> |         |                   |
|                    |        |                   |         | 843               |
| 859m               | 861s   | 853s              | 861s    | 855               |
| 875s               | 875s   | 872s              | 875s    | 871               |
|                    | 913s   |                   | 913s    |                   |
| 940s               | 935s   | 940s              | 935vs   | 941               |
| 1019s              | 1037s  | 1019s             | 1037s   | 1016              |
| 1149vs             | 1159vs | 1149s             | 1159s   | 1148              |
|                    |        |                   |         | 1178 <sup>a</sup> |
| 1212m              | 1235s  |                   | 1235s   | 1208              |
|                    |        | 1318s             | 1340s   | 1316              |
| 1409s <sup>a</sup> | 1341m  |                   |         |                   |
|                    |        | 1421s             | 1449vs  | 1420              |
| 1457m              | 1449s  | 1460vs            | 1496s   | 1460              |
| 1509w              | 1496vs | 1514vs            |         | 1517              |
|                    |        |                   |         | 1537 <sup>a</sup> |
| 1544s              | 1533s  | 1543vs            | 1533vvs | 1548              |
| 1591s              | 1593s  | 1589s             | 1593vvs | 1589              |
|                    | 1635vs |                   | 1635s   |                   |

<sup>a</sup> Apparently, the observed differences in the known and obtained FTDO spectra are due to crystal polymorphism.

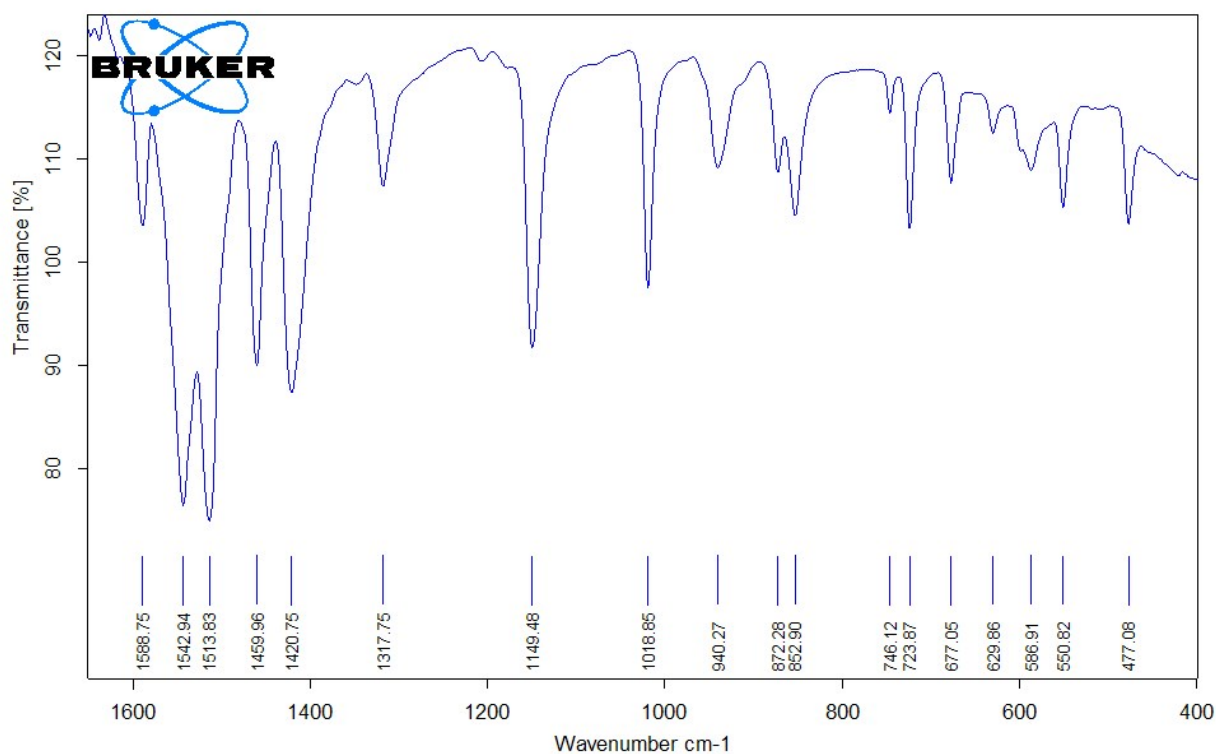

**Figure S5.** FTIR spectrum of FTDO (KBr).

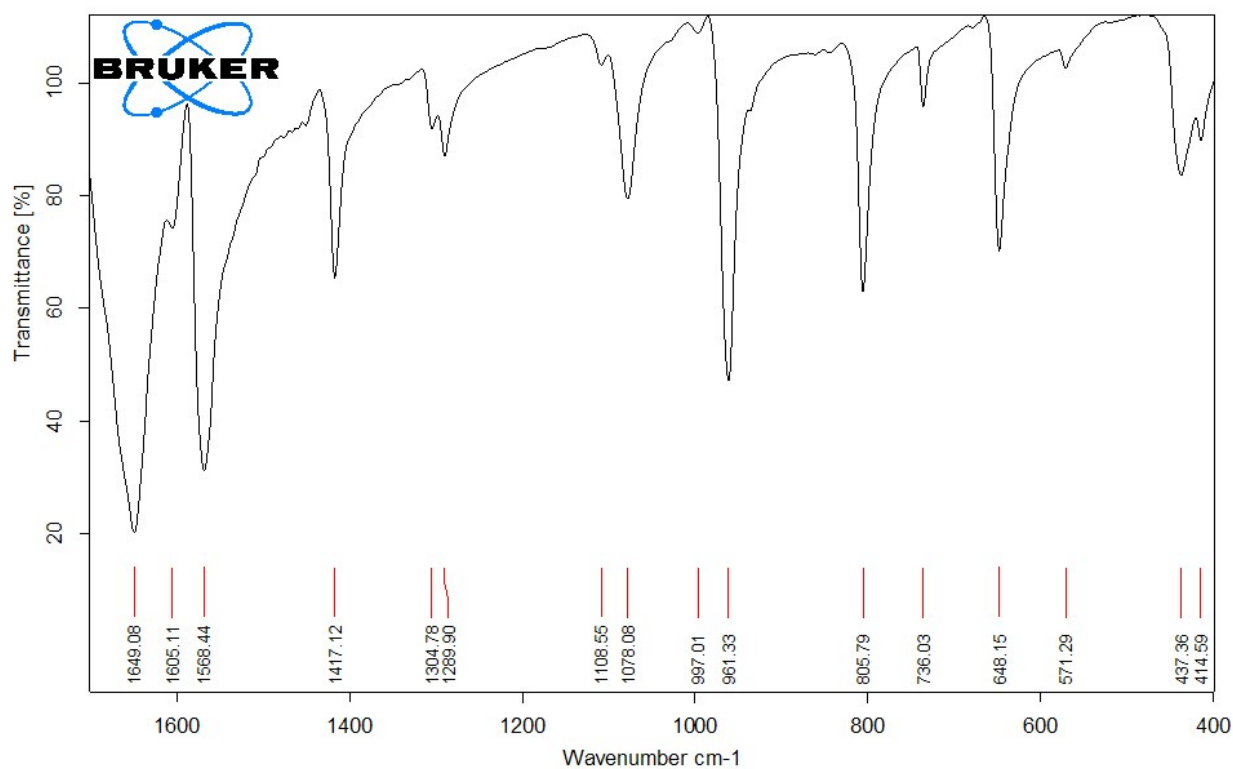

**Figure S6.** FTIR spectrum of BTF (KBr).

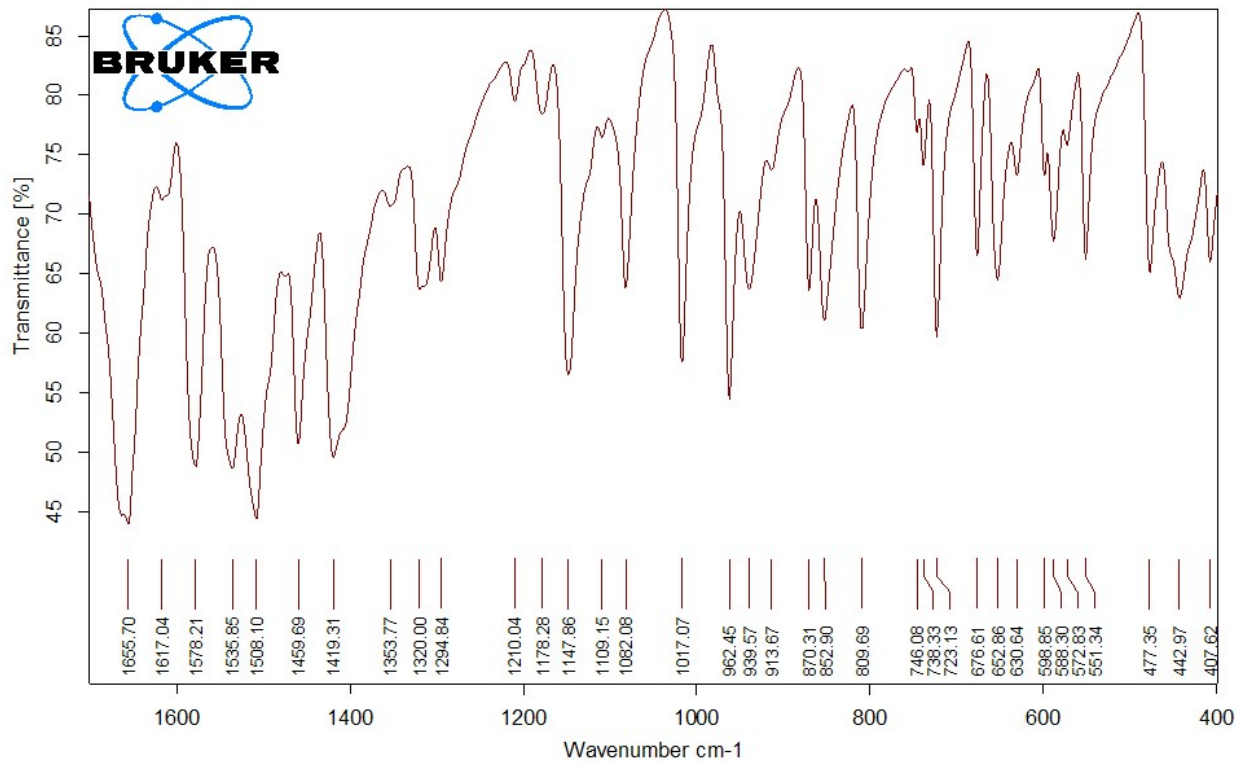

**Figure S7.** FTIR spectrum of FTDO-BTF (3:1) cocrystal (KBr).

<sup>1</sup> K. I. Rezchikova, A. M. Churakov, V. A. Shlyapochnikov, V. A. Tartakovsky, *Russ. Chem.*



---

*Bull. Int. Ed.*, 1995, **44**, 2093–2095.

<sup>2</sup> N. Bacon, A. J. Boulton, A. R. Katritzky, *Trans. Faraday Soc.*, 1967, **63**, 833–835.

<sup>3</sup> A. S. Bailey, J. R. Case, *Tetrahedron*, 1958, **3** (2), 113–131.
